# Supplementary material for: Regulation of IkappaB Protein Expression by Early Gestation in the Thymus of Ewes
Source: MDPI journal article supplement (doi:10.3390/vetsci10070462), 2023-07-13
Supplement: s1 [file s1]

Table S1 Primers used for RT-qPCR

| Gene          | Primer  | Sequence                   | Size<br>(bp) | Accession<br>numbers |
|---------------|---------|----------------------------|--------------|----------------------|
| <i>BCL-3</i>  | Forward | GCGACCAGAGGCAATTTACTACCAG  | 98           | XM_027978453.2       |
|               | Reverse | GAGGTGTAGGCAAGTTCAGCAGAG   |              |                      |
| <i>NFKBIA</i> | Forward | AGGACGAGGAGTATGAGCAGATGG   | 130          | NM_001166184.1       |
|               | Reverse | GCCAAGTGCAGGAACGAGTCTC     |              |                      |
| <i>NFKBIB</i> | Forward | CCCCAAGACCTACCTCGCTCAG     | 119          | XM_027978262.2       |
|               | Reverse | TCCAGTCCTCTTCACTCTCATCCTC  |              |                      |
| <i>NFKBIE</i> | Forward | GCACTCACGTACATTTCCGAGGAC   | 97           | XM_042236979.1       |
|               | Reverse | GCAGCAGAGCCAGGCAATACAG     |              |                      |
| <i>IKBKG</i>  | Forward | GGGCAACCAGAGGGAGGAGAAG     | 146          | XM_027963334.2       |
|               | Reverse | GGCATGTCTTCAGGCGTTCCAC     |              |                      |
| <i>NFKBIZ</i> | Forward | GCAAAGGCGTACAATGGAAACACC   | 137          | NM_001306117.1       |
|               | Reverse | GGCTGCTCGTTCTCCAAGTTCC     |              |                      |
| <i>NFKBID</i> | Forward | ACATTTCGTGAGCATAAGGGCAAGAC | 114          | XM_027977435.2       |
|               | Reverse | GATGGTCAGTGGCATTGGGTTCC    |              |                      |
| <i>GAPDH</i>  | Forward | GGGTCATCATCTCTGCACCT       | 176          | NM_001190390.1       |
|               | Reverse | GGTCATAAGTCCCTCCACGA       |              |                      |
