# Supplementary material for: Regulation of IkappaB Protein Expression by Early Gestation in the Thymus of Ewes
Source: MDPI journal article supplement (doi:10.3390/vetsci10070462), 2023-07-13

Figure S2 Original Western Blot Figure for Figure 2

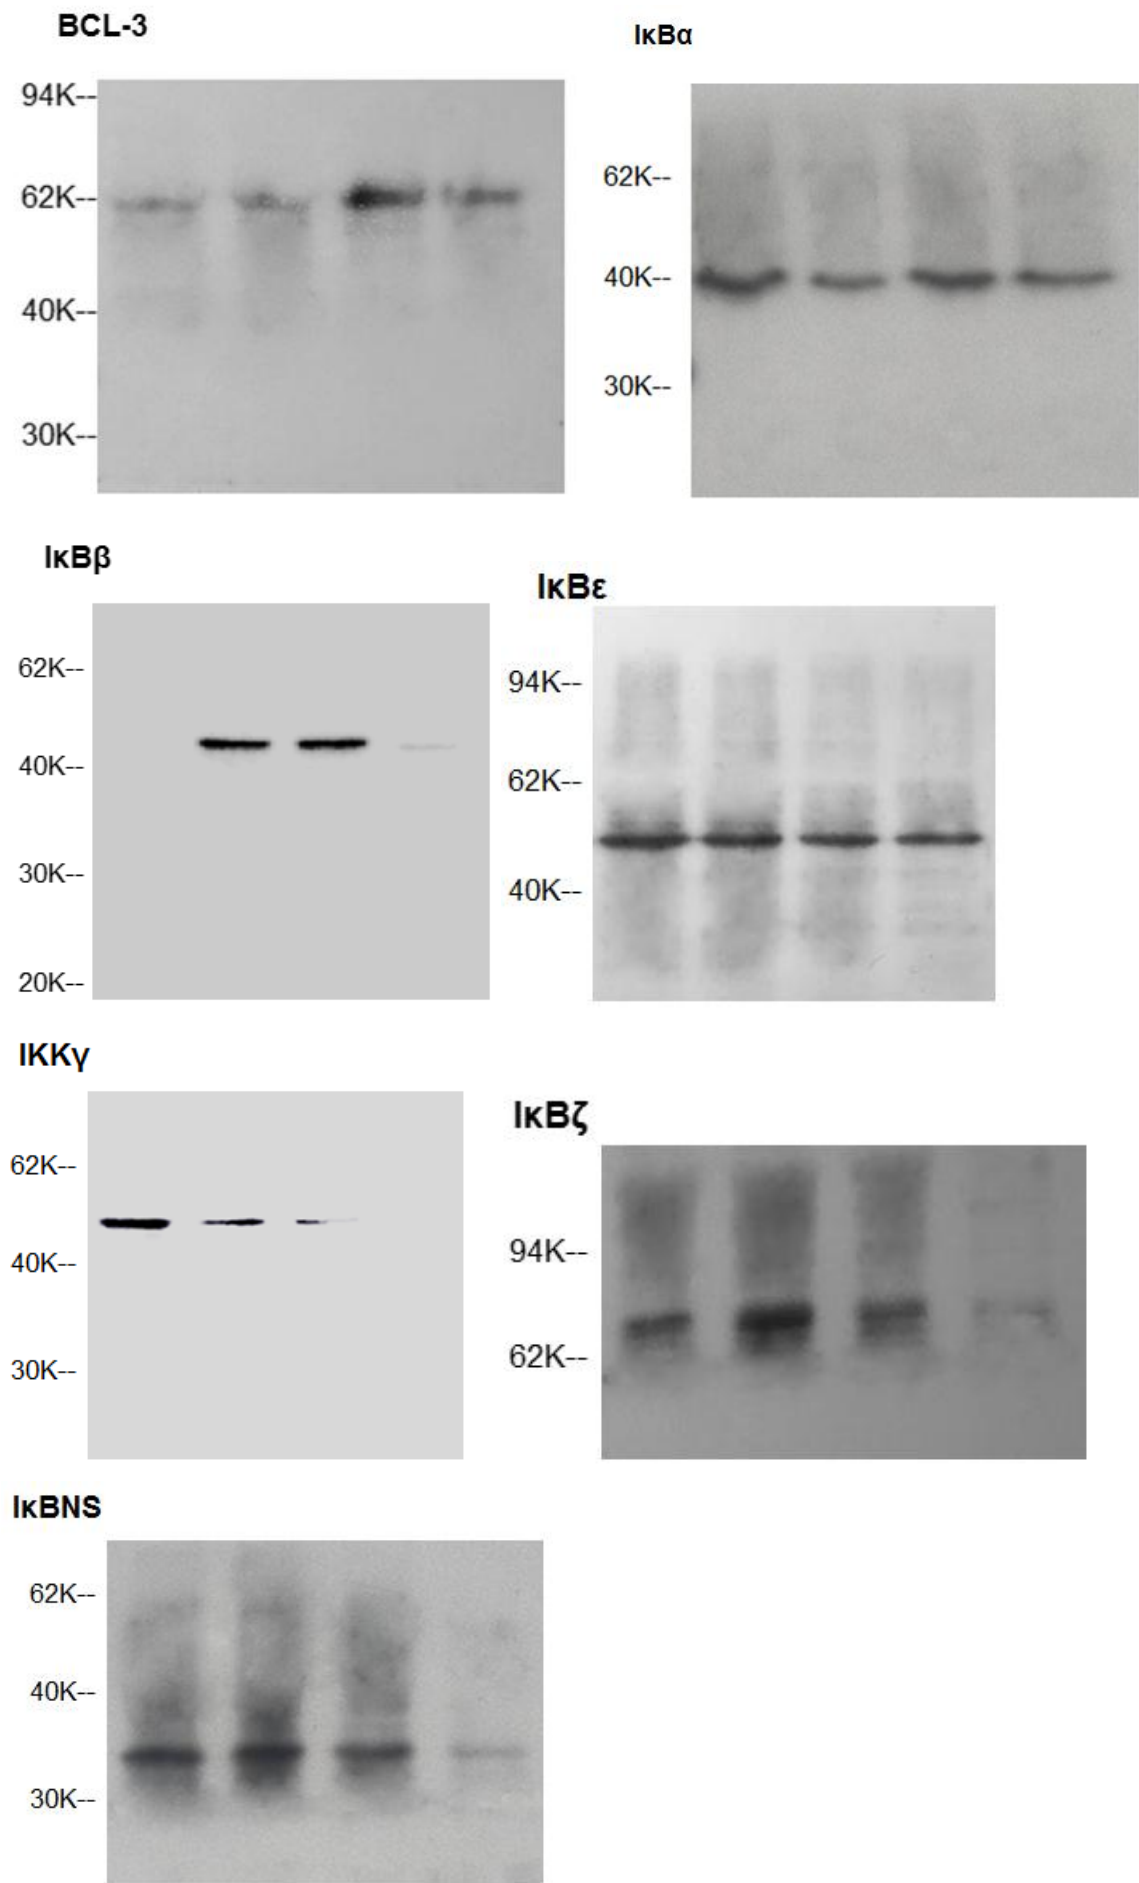

GAPDH-BCL-3

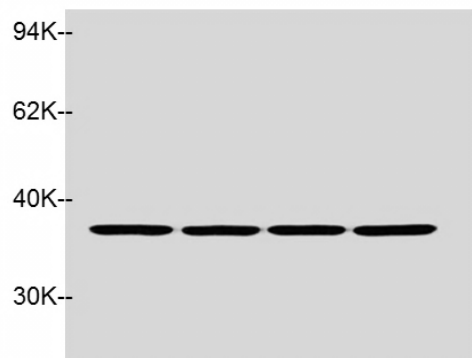

GAPDH-I $\kappa$ B $\alpha$

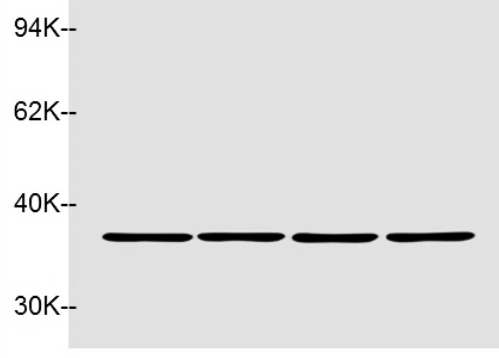

GAPDH-I $\kappa$ B $\beta$

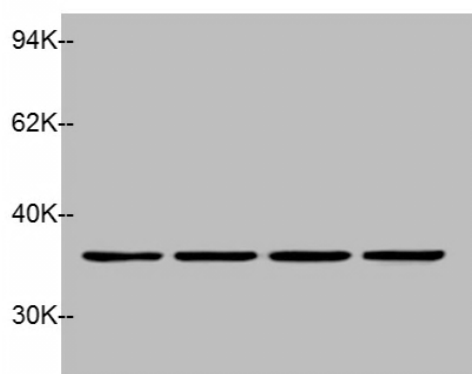

GAPDH-I $\kappa$ B $\epsilon$

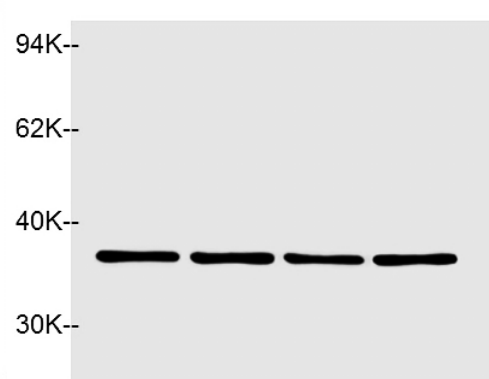

GAPDH-IKK $\gamma$

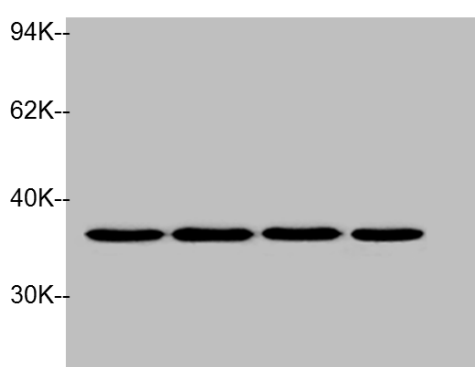

GAPDH-I $\kappa$ B $\zeta$

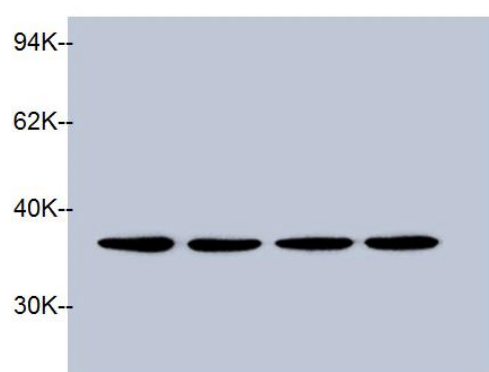

GAPDH-I $\kappa$ BNS

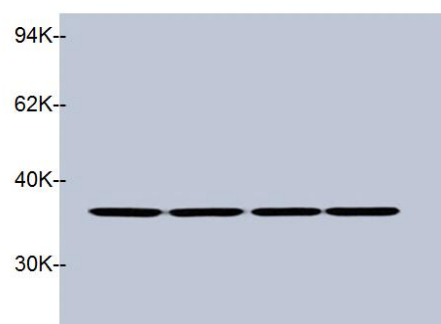

Supplement: s1 [file s1]
