# Supplementary material for: Regulation of IkappaB Protein Expression by Early Gestation in the Thymus of Ewes
Source: MDPI journal article supplement (doi:10.3390/vetsci10070462), 2023-07-13
Supplement: s1 [file s1]

Table S2 Relative expression values of mRNA

| Item   | DN16 | DP13 | DP16 | DP25 |
|--------|------|------|------|------|
| BCL-3  | 1    | 1.02 | 3.87 | 1.72 |
| NFKBIA | 1    | 0.31 | 0.58 | 0.67 |
| NFKBIB | 1    | 3.55 | 3.97 | 1.82 |
| NFKBIE | 1    | 0.63 | 0.58 | 0.59 |
| IKBKG  | 1    | 0.37 | 0.36 | 0.13 |
| NFKBIZ | 1    | 4.18 | 1.03 | 0.43 |
| NFKBID | 1    | 2.53 | 0.55 | 0.23 |
