# Supplementary material for: Regulation of IkappaB Protein Expression by Early Gestation in the Thymus of Ewes
Source: Vet Sci. 2023 Jul 13;10(7):462. doi: 10.3390/vetsci10070462 (PMC10384501; doi:10.3390/vetsci10070462)
Supplement: Supplementary file 1 [file vetsci-10-00462-s001.zip]

Archive with 4 entries (4 files):
- Figure S1 Amplification curve.pdf
- Figure S2 Original Western Blot Figure for Figure 2.pdf
- Table S1 Primers.pdf
- Table S2 Relative expression values of mRNA.pdf
