# Supplementary figures and images for: Regulation of IkappaB Protein Expression by Early Gestation in the Thymus of Ewes
Source: MDPI journal article supplement (doi:10.3390/vetsci10070462), 2023-07-13

## Amplification curve

### 1. BCL-3

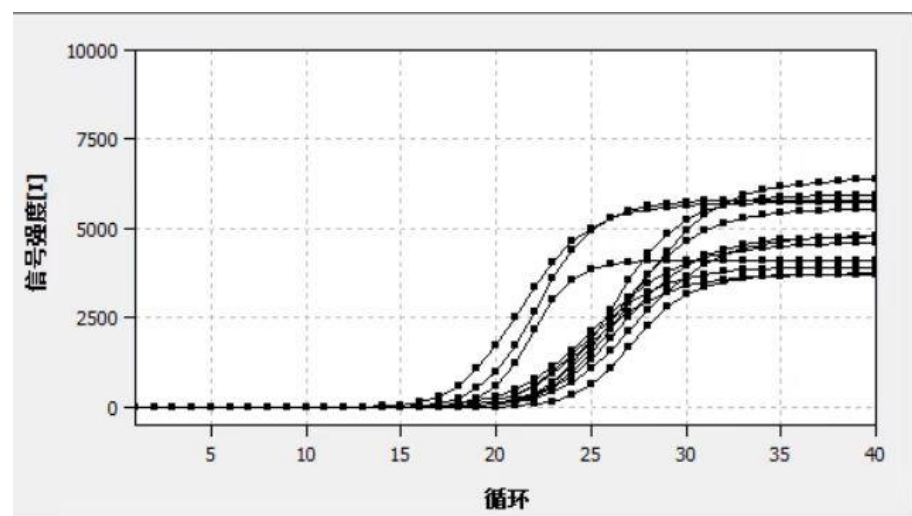

### 2. NFKBIA

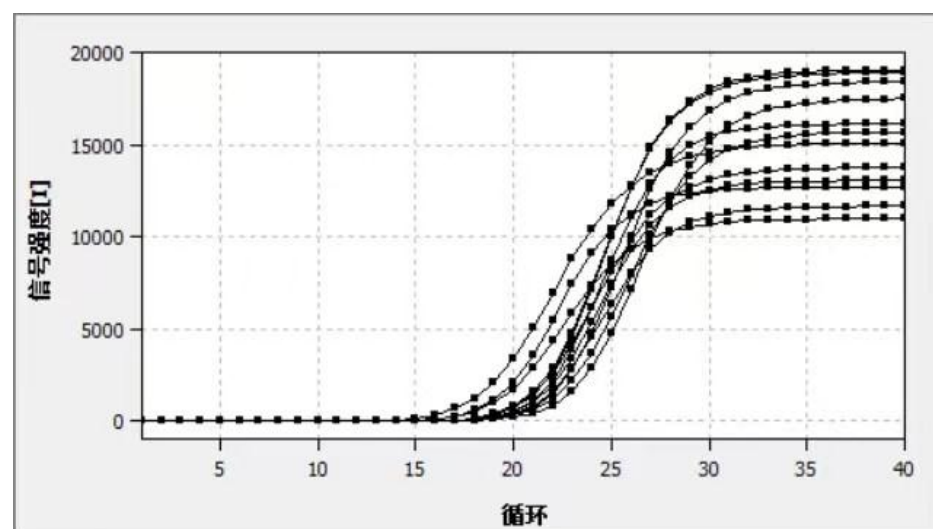

### 3. NFKBIB

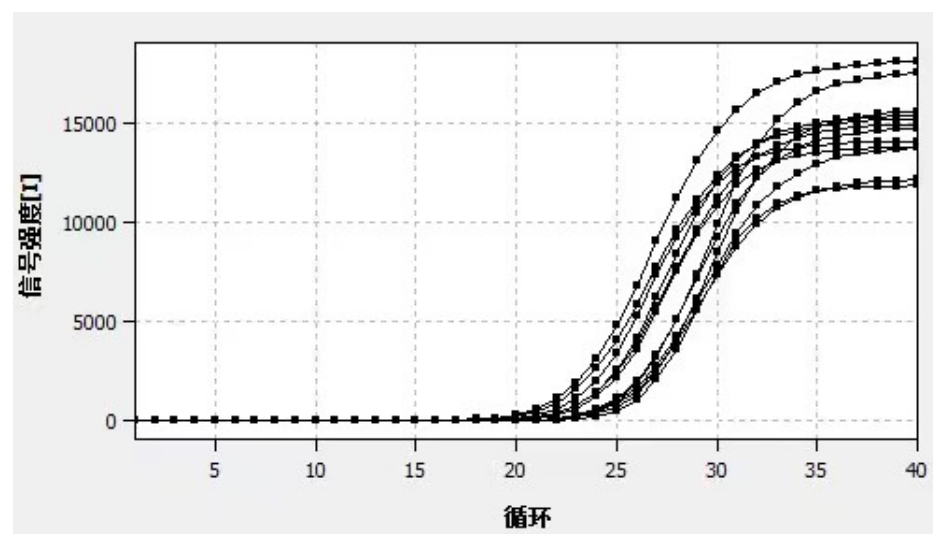

#### 4. NFKBIE

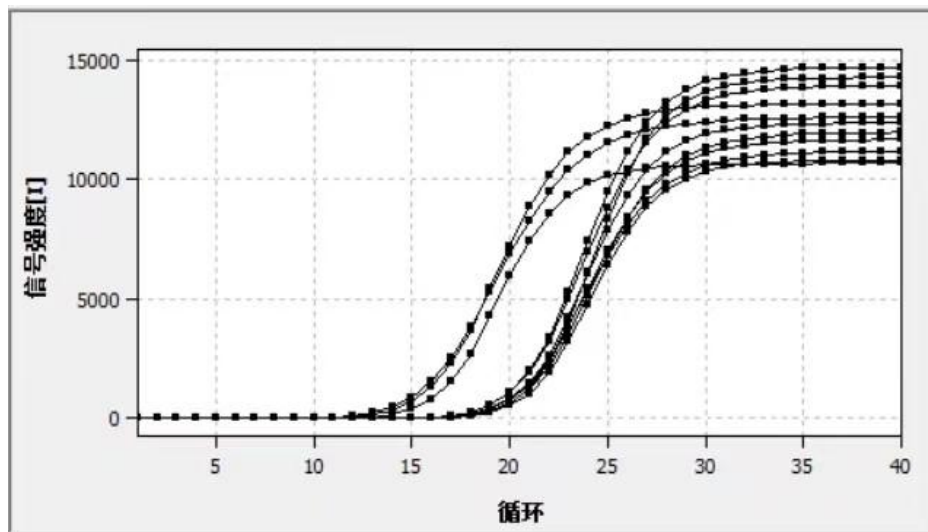

#### 5. IKBKG

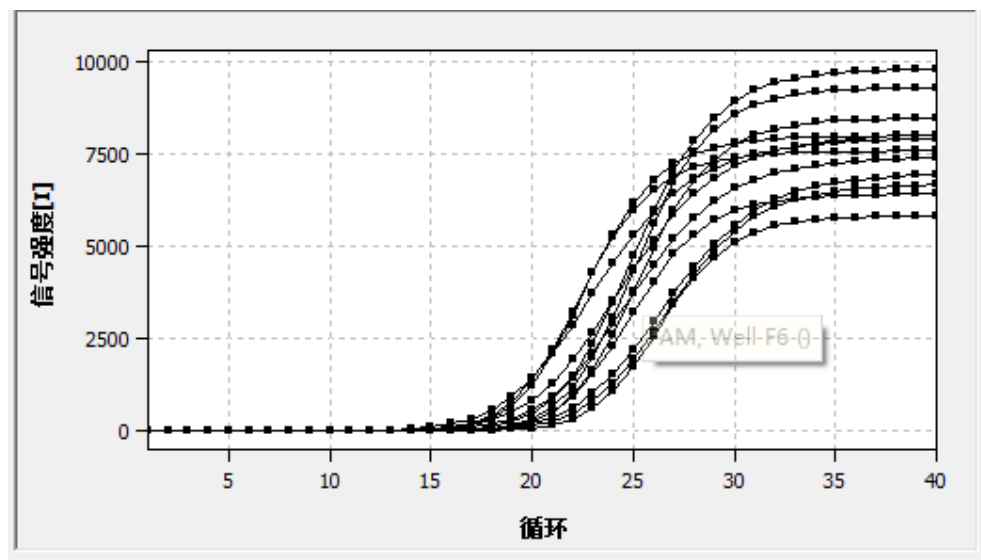

#### 6. NFKBIZ

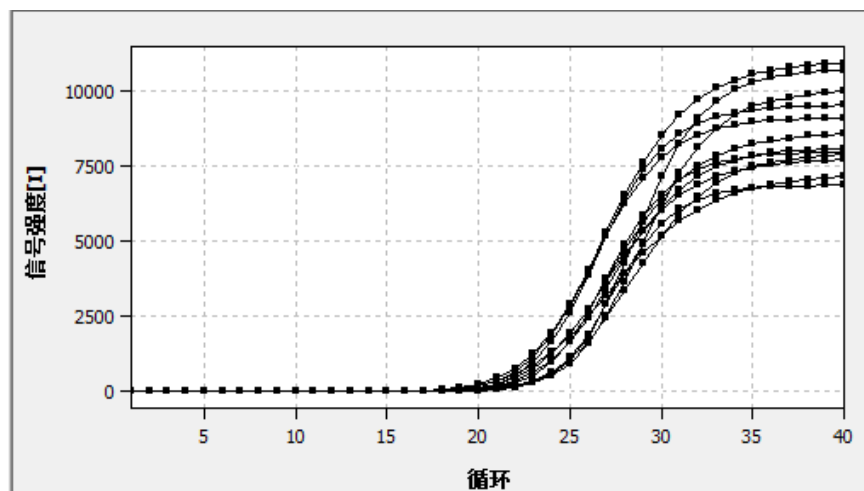

## 7. NFKBID

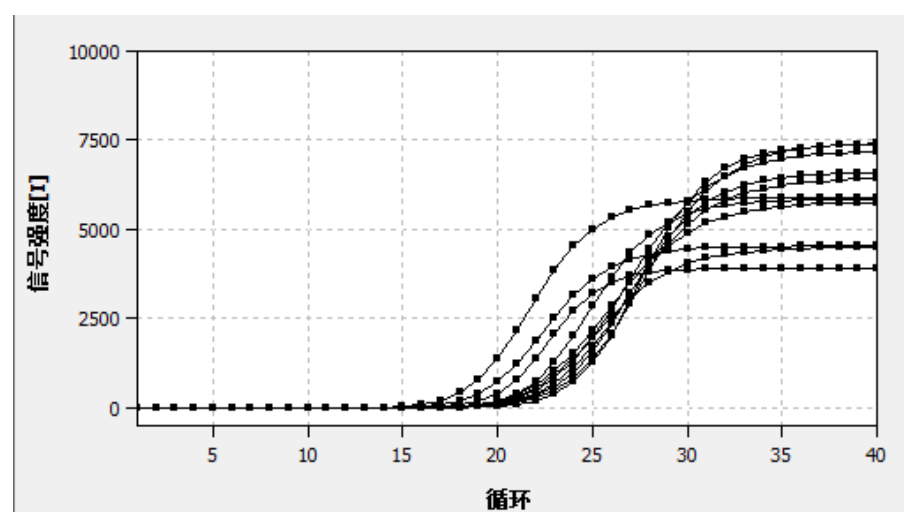

Supplement: s1 [file s1]
